# Supplementary material
Source: publisher figshare collection journal article supplement (https://acs.figshare.com/ndownloader/files/4300771)
Supplement: Supplementary file 1 [file 4300771]

**SUPPORTING INFORMATION for:**

# Topotactic Transformations of Superstructures: From Thin Films to 2D Networks to Nested 2D Networks

*Chuan Fei Guo,<sup>†,§</sup> Sihai Cao,<sup>‡</sup> Jianming Zhang,<sup>†,§</sup> Haoying Tang,<sup>†,§</sup> Shengming Guo,<sup>\*,†</sup>*

*Ye Tian,<sup>†,§</sup> and Qian Liu<sup>\*,†,§,□</sup>*

<sup>†</sup>National Center for Nanoscience and Technology, China, No. 11 Beiyitiao, Zhongguancun, Beijing 100190, China

<sup>§</sup>Graduate School of the Chinese Academy of Sciences, Beijing 100190, China

<sup>‡</sup>Beijing BOE Energy Technology Co., Ltd., No. 10 Jiuxianqiao Road, Beijing 100015, China

<sup>□</sup>TEDA Applied Physics School, Nankai University, Tianjin 300457, China

\* To whom correspondence should be addressed. Email: (QL) liuq@nanoctr.cn; (SMG) guoshengming@nanoctr.cn. Tel:+861082545585. Fax: +861062656765.

**METHODS. *Synthesis.*** Amorphous  $\text{BiO}_x$  films (50~200 nm) were deposited by RF reactive magnetron sputtering with gas flow ratios (Ar and  $\text{O}_2$ ) of 20 and 5 sccm, respectively.  $\beta\text{-Bi}_2\text{O}_3$  films were prepared by heating the amorphous  $\text{BiO}_x$  films at 500 °C for 2 h.  $\text{BiOCl}$  2DONWs were obtained by dipping a  $\beta\text{-Bi}_2\text{O}_3$  film in hydrochloric acid solution (0.24 M, actually the concentration can change from 0.01 to 1.00 M) for 0.5~10 min. For the synthesis of  $\text{Bi}_2\text{S}_3$  N2DONWs, a  $\beta\text{-Bi}_2\text{O}_3$  film was incubated at 60 °C for two days in pre-blended solution of hydrochloric acid (0.024 M) and TAA (0.045 M),  $\text{BiOCl}$  2DONWs were formed very quickly to ensure its function as the sacrificial template for the formation of  $\text{Bi}_2\text{S}_3$  N2DONWs.

Periodic  $\text{BiOCl}$  nanowalls were prepared as follows: a PMMA thin film was spin coated on a  $\beta\text{-Bi}_2\text{O}_3$  film, and periodic hole arrays (diameter of 30 nm and pitch of 200 nm) in the PMMA film were fabricated by e-beam lithography. The specimen was then dipped in diluted hydrochloric acid solution (0.04 M), leading to the formation of periodic  $\text{BiOCl}$  nuclei. The PMMA film was then removed by washing in acetone so that the  $\beta\text{-Bi}_2\text{O}_3$  film with periodic  $\text{BiOCl}$  nucleus arrays was naked. Finally the specimen was dipping in hydrochloric acid solution (0.04 M) again, and periodic  $\text{BiOCl}$  nanowall arrays were formed where with the preformed  $\text{BiOCl}$  nucleus arrays.

*Preparation of TEM specimen.* For obtaining a preferred specimen, a layer of photoresist (Shipley S1813) was spin-coated on a  $\beta\text{-Bi}_2\text{O}_3$  film, and then a periodic pattern composed of squares was made by a standard UV photolithography process, thus partial the  $\beta\text{-Bi}_2\text{O}_3$  film was covered by photoresist. After dipping it into hydrochloric acid solution (0.24 M), for some crystal domains, only the exposed area was turned to  $\text{BiOCl}$  2DONW while the other part which was covered by photoresist remained  $\beta\text{-Bi}_2\text{O}_3$  phase. A slice from the boundary of such a domain containing both  $\beta\text{-Bi}_2\text{O}_3$  and  $\text{BiOCl}$  with the cross section rightly perpendicular to one set of

nanowalls (and parallel to the other set) was made using focused ion beam (FIB) milling, then welded to a Cu TEM grid and finally thinned to  $\sim 100$  nm for TEM observation.

*Characterization.* Structure of the films was determined by XRD (Philips X' pert Pro) analysis. Reflected optical images of the films were taken by optical microscopy (Olympus BX-51), and we used SEM (Hitachi S-4800, 5~10 kV) and TEM (FEI Tecnai F20, 200 kV) to observe the morphology of the nanostructures. HRTEM and SAED operated in the FEI F20 TEM were used to characterize the crystal structure of the nanostructures.

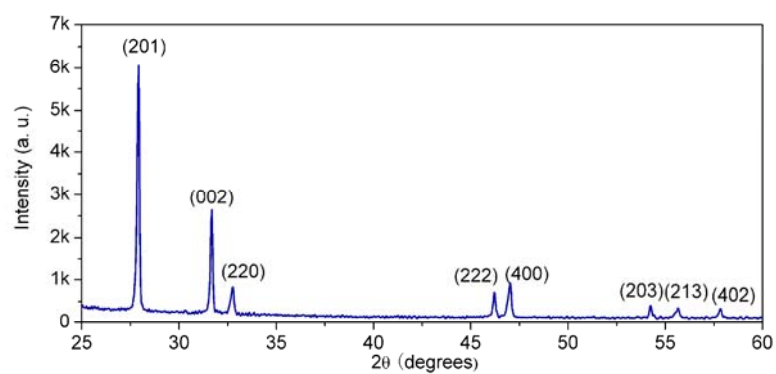

**FIGURE S1.** XRD pattern of a  $\beta$ - $\text{Bi}_2\text{O}_3$  film obtained by heating an amorphous  $\text{BiO}_x$  film (200 nm thick) at 500 °C for 3 h.

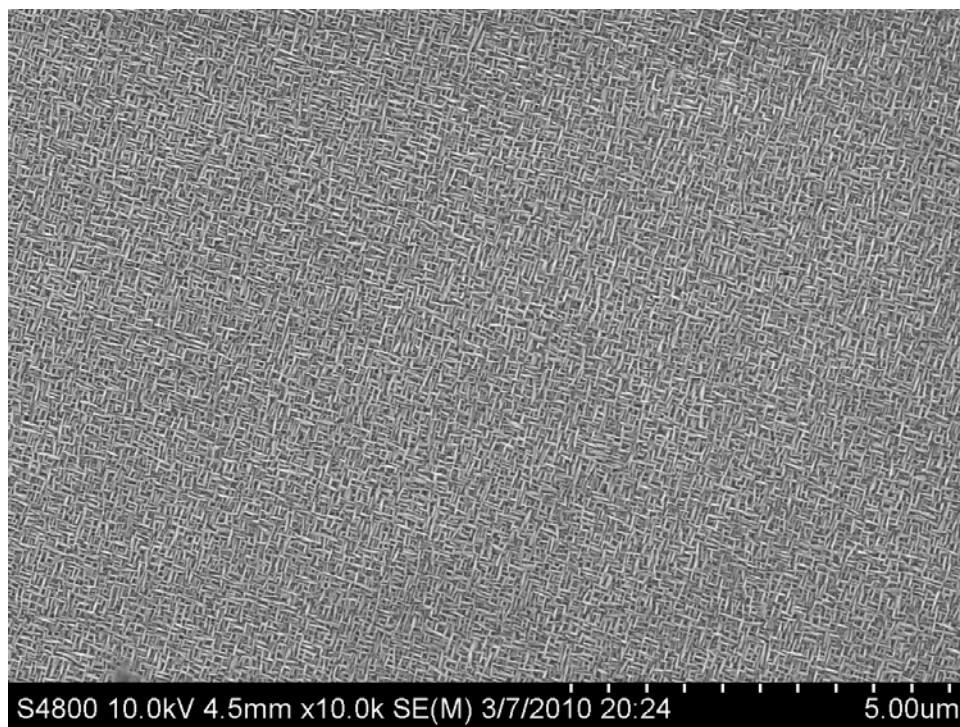

**FIGURE S2.** SEM image of a vertical BiOCl 2DONW on micron scale.

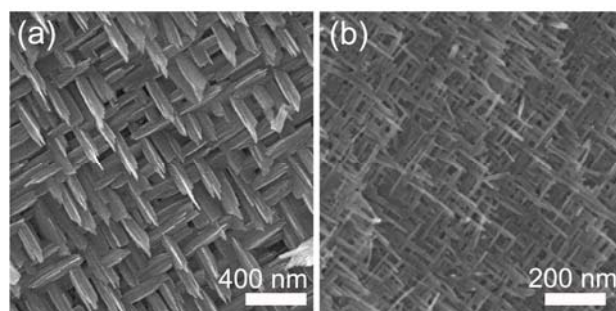

**FIGURE S3.**  $\text{Bi}_2\text{S}_3$  networks evolved from tiled  $\text{BiOCl}$  nanowalls by reacting in preblended solution of TAA and  $\text{HCl}$  with different concentrations of  $\text{HCl}$ : (a) 0.05 M TAA +0.10 M  $\text{HCl}$ ; (b) 0.05 M TAA +0.02 M  $\text{HCl}$ .

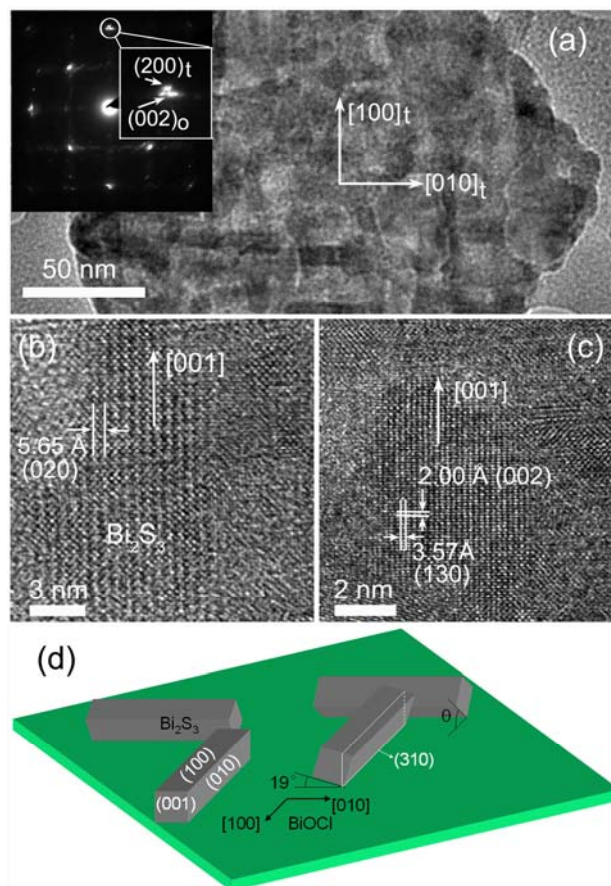

**FIGURE S4.** (a) TEM image of a heterostructured BiOCl-Bi<sub>2</sub>S<sub>3</sub> plate, in which only a part of BiOCl has transformed to Bi<sub>2</sub>S<sub>3</sub> nanorods or nuclei. The inset is a corresponding SAED pattern (‘t’ represents tetragonal BiOCl while ‘o’ represents orthorhombic Bi<sub>2</sub>S<sub>3</sub>) indicates the lattice matching of Bi<sub>2</sub>S<sub>3</sub> and BiOCl with (002)<sub>Bi<sub>2</sub>S<sub>3</sub></sub>|| (200)<sub>BiOCl</sub>. (b) and (c) HRTEM images of two Bi<sub>2</sub>S<sub>3</sub> nuclei, although both of their [001] directions are parallel to the [100] direction of the BiOCl precursor, they are actually not in the same crystal orientation but with a lattice rotation of ~ 19° around the *c*-axis. (d) Schematic illustration of Bi<sub>2</sub>S<sub>3</sub> nanorods grown on BiOCl, the angle ‘θ’ implies that the nanorods grow without a definite epitaxial relationship with the BiOCl precursor.
